# Supplementary material for: Iflavirus Covert Infection Increases Susceptibility to Nucleopolyhedrovirus Disease in Spodoptera exigua
Source: MDPI journal article supplement (doi:10.3390/v12050509), 2020-05-05
Supplement: s1 [file s1]

**Table 1: Primer sequences and description of the genomic region targeted for qPCR.**

| Primer       | Sequence                                                                | Description                                                                               |
|--------------|-------------------------------------------------------------------------|-------------------------------------------------------------------------------------------|
| SeIV-1q      | F: 5'- TGTGAAGTTAGACACGCATGGAA-3'<br>R: 5'-CGACTTGTGCTACTCTCTTCATCAA-3' | Amplifies a 97-bp fragment in the RNA-dependent RNA polymerase (RdRp) region from SeIV-1. |
| SeIV-2q      | F :5'-CCGCTCGCTTATTGAAACGT-3'<br>R: 5'-CATGAGACAGCTGGAATTGGAA-3'        | Amplifies a 78-bp fragment in the RNA-dependent RNA polymerase (RdRp) region from SeIV-2. |
| qATPsynthase | F: 5'-GTTGCTGGTCTGGTGGGATT-3'<br>R: 5'-AGGCCTCAGACACCATTGAAA-3'         | Amplifies a 72-bp fragment in ATP-synthase subunit C gene from <i>S. exigua</i> .         |

Carballo, A.; Murillo, R.; Jakubowska, A.; Herrero, S.; Williams, T.; Caballero, P. Co-infection with iflaviruses influences the insecticidal properties of *Spodoptera exigua* multiple nucleopolyhedrovirus occlusion bodies: Implications for the production and biosecurity of baculovirus insecticides. *PLoS One* 2017, 12, e0177301:1-14. <https://doi.org/10.1371/journal.pone.0177301.t001>
